# Supplementary material for: Association between Sedentary Behavior during Leisure Time and Excessive Weight in Chinese Children, Adolescents, and Adults
Source: MDPI journal article supplement (doi:10.3390/nu15020424), 2023-01-13
Supplement: s1 [file s1]

**Table S1. Characteristics of the study participants according to sex**

|                                                      | Male             | Female           |
|------------------------------------------------------|------------------|------------------|
| <b>Age</b>                                           | 47.06 ± 16.53    | 47.51 ± 16.11    |
| <b>BMI</b>                                           | 23.62 ± 3.19     | 23.71 ± 3.39     |
| <b>Leisure-time PA (hours/day)</b>                   | 0 (0-3.0)        | 0 (0-3.0)        |
| <b>Leisure-time SB (hours/day)</b>                   |                  |                  |
| Watch TV or video                                    | 2.0 (0-15.29)    | 2.0 (0-15.14)    |
| Computer use                                         | 0 (0-13.0)       | 0 (0-10.29)      |
| Play online or video games                           | 0 (0-10.0)       | 0 (0-6.0)        |
| Do Homework                                          | 0 (0-7.71)       | 0 (0-12.14)      |
| Reading                                              | 0 (0-13.0)       | 0 (0-11.43)      |
| <b>Total leisure-time sedentary time (hours/day)</b> | 2.52 (0-15.86)   | 2.29 (0-15.49)   |
| <b>Energy intake (kcal/day)</b>                      | 2.35 (0.08-6.20) | 1.98 (0.19-6.19) |

Results are presented as mean ± SD, median (range)

**Table S2. Sample Size for Leisure-time sedentary behaviors in the Chinese population by sociodemographic and lifestyle characteristics, CHNS 2004-2011**

| Variables                | No. of Participants by Age group, n (%) |             |              |              |             |
|--------------------------|-----------------------------------------|-------------|--------------|--------------|-------------|
|                          | 6- 11                                   | 12 - 17     | 18 - 44      | 45 - 59      | ≥ 60        |
| <b>Overall</b>           | 513 (100)                               | 1286 (100)  | 13494 (100)  | 12492 (100)  | 8384 (100)  |
| <b>Sex</b>               |                                         |             |              |              |             |
| Male                     | 308 (58.6)                              | 657 (51.1)  | 6350 (47.1)  | 5985 (47.9)  | 4028 (48.0) |
| Female                   | 205 (42.2)                              | 629 (48.9)  | 7144 (52.9)  | 6507 (52.1)  | 4356 (52.0) |
| <b>Weight status</b>     |                                         |             |              |              |             |
| Normal                   | 410 (79.9)                              | 1102 (85.7) | 8617 (63.9)  | 6458 (51.7)  | 4583 (54.7) |
| <b>Excessive weight</b>  | 103 (20.1)                              | 184 (14.3)  | 4877 (36.1)  | 6034 (48.3)  | 3801 (45.3) |
| <b>Educational level</b> |                                         |             |              |              |             |
| <High school             | -                                       | -           | 8581 (63.6)  | 9005 (72.1)  | 6953 (82.9) |
| High school              | -                                       | -           | 3312 (24.5)  | 2897 (23.2)  | 983 (11.7)  |
| >High school             | -                                       | -           | 1580 (11.7)  | 580 (4.6)    | 426 (5.1)   |
| Missing                  | -                                       | -           | 21 (0.2)     | 10 (0.1)     | 22 (0.3)    |
| <b>Region</b>            |                                         |             |              |              |             |
| Rural                    | 311 (60.6)                              | 792 (61.6)  | 9157 (67.9)  | 8170 (65.4)  | 4715 (56.2) |
| Urban                    | 202 (39.4)                              | 494 (38.4)  | 4337 (32.1)  | 4322 (34.6)  | 3669 (43.8) |
| <b>Leisure-time PA</b>   |                                         |             |              |              |             |
| < 60 min/week            | 339 (66.1)                              | 801 (62.3)  | 11876 (88.0) | 11065 (88.6) | 7238 (86.3) |
| ≥ 60 min/week            | 24 (4.7)                                | 62 (4.8)    | 200 (1.5)    | 104 (0.8)    | 43 (0.5)    |
| ≥ 150 min/week           | 63 (12.3)                               | 136 (19.6)  | 497 (3.7)    | 283 (2.3)    | 251 (3.0)   |
| ≥ 300 min/week           | 87 (17.0)                               | 287 (22.3)  | 923 (6.8)    | 1040 (8.3)   | 852 (10.2)  |
| <b>Smoking status</b>    |                                         |             |              |              |             |
| Never                    | -                                       | 1244 (97.7) | 9605 (71.2)  | 8211 (65.7)  | 5670 (67.6) |
| Former                   | -                                       | 7 (0.5)     | 244 (1.8)    | 434 (3.5)    | 683 (8.1)   |
| Current                  | -                                       | 27 (2.1)    | 3632 (26.9)  | 3835 (30.7)  | 2025 (24.2) |
| Missing                  |                                         | 8 (0.6)     |              | 12 (0.1)     |             |
| <b>Leisure-time SB</b>   |                                         |             |              |              |             |
| <b>Watch TV or video</b> |                                         |             |              |              |             |
| ≤ 1.0 hour/day           | 197 (38.4)                              | 657 (51.1)  | 3254 (24.1)  | 2681 (21.5)  | 2137 (25.5) |
| 1.1-2.0 hours/day        | 192 (37.4)                              | 495 (38.5)  | 5026 (37.2)  | 4729 (37.9)  | 2824 (33.7) |
| > 2.0 hours/day          | 124 (24.2)                              | 134 (10.4)  | 5214 (38.6)  | 5082 (40.7)  | 3423 (40.8) |
| <b>Computer use</b>      |                                         |             |              |              |             |
| < 1.0 hour/day           | 488 (95.1)                              | 1069 (83.1) | 10913 (80.9) | 11846 (94.8) | 8232 (98.2) |
| ≥ 1.0 hours/day          | 25 (4.9)                                | 217 (16.9)  | 2581 (19.1)  | 646 (5.2)    | 152 (1.8)   |

|                                   |            |             |              |              |             |
|-----------------------------------|------------|-------------|--------------|--------------|-------------|
| <b>Play online or video games</b> |            |             |              |              |             |
| < 1.0 hour/day                    | 476 (92.8) | 1170 (91.0) | 12026 (89.1) | 12077 (96.7) | 8293 (98.9) |
| ≥ 1.0 hours/day                   | 37 (7.2)   | 116 (9.0)   | 1468 (10.9)  | 415 (3.3)    | 91 (1.1)    |
| <b>Do Homework</b>                |            |             |              |              |             |
| < 1.0 hour/day                    | 167 (32.6) | 523 (40.7)  | -            | -            | -           |
| ≥ 1.0 hours/day                   | 346 (67.4) | 763 (59.3)  | -            | -            | -           |
| <b>Reading</b>                    |            |             |              |              |             |
| < 1.0 hour/day                    | 389 (75.8) | 1005 (78.1) | 12026 (89.1) | 11137 (89.2) | 7147 (85.2) |
| ≥ 1.0 hours/day                   | 124 (24.2) | 281 (21.9)  | 1468 (10.9)  | 1355 (10.8)  | 1237 (14.8) |
| <b>Survey year</b>                |            |             |              |              |             |
| 2004                              | 100 (19.5) | 403 (31.3)  | 3345 (24.8)  | 2627 (21.0)  | 1432 (17.1) |
| 2006                              | 106 (20.7) | 271 (21.1)  | 3209 (23.8)  | 2620 (21.0)  | 1677 (20.0) |
| 2009                              | 101 (19.7) | 244 (19.0)  | 3057 (22.7)  | 3055 (24.5)  | 2120 (25.3) |
| 2011                              | 206 (40.2) | 368 (28.6)  | 3883 (28.8)  | 4190 (33.5)  | 3155 (37.6) |

---

Note: Excessive weight: combined overweight and obesity; PA: physical activity; SB: sedentary behavior.

**Table S3. Association of total leisure-time sedentary time with excessive weight among the Chinese population, CHNS 2004-2011**

| Variables                                | OR (95% C.I.)       |                     |
|------------------------------------------|---------------------|---------------------|
|                                          | Male                | Female              |
| <b>Age, years</b>                        | 1.009 (1.006-1.011) | 1.024 (1.022-1.026) |
| <b>Educational level</b>                 |                     |                     |
| < high school                            | 1 [Reference]       | 1 [Reference]       |
| high school                              | 1.349 (1.249-1.458) | 0.775 (0.711-0.845) |
| > high school                            | 1.420 (1.261-1.599) | 0.530 (0.456-0.616) |
| <b>Region</b>                            |                     |                     |
| Rural                                    | 1 [Reference]       | 1 [Reference]       |
| Urban                                    | 1.376 (1.281-1.478) | 1.046 (0.976-1.121) |
| <b>Survey year</b>                       |                     |                     |
| 2004                                     | 1 [Reference]       | 1 [Reference]       |
| 2006                                     | 1.084 (0.985-1.193) | 0.964 (0.879-1.057) |
| 2008                                     | 1.262 (1.150-1.385) | 1.012 (0.925-1.107) |
| 2011                                     | 1.415 (1.296-1.545) | 1.203 (1.105-1.309) |
| <b>Leisure-time PA (hours/day)</b>       | 0.993 (0.984-1.003) | 1.007 (0.997-1.017) |
| <b>Energy intake (kcal/day)</b>          | 1.171 (1.126-1.218) | 1.142 (1.095-1.192) |
| <b>Smoking status</b>                    |                     |                     |
| Never                                    | 1 [Reference]       | 1 [Reference]       |
| Former                                   | 1.170 (1.033-1.325) | 1.028 (0.645-1.636) |
| Current                                  | 0.830 (0.777-0.887) | 0.860 (0.726-1.019) |
| <b>Total leisure-time sedentary time</b> |                     |                     |
| ≤ 1 hour/day                             | 1 [Reference]       | 1 [Reference]       |
| ≤ 2 hours/day                            | 1.214 (1.095-1.346) | 1.185 (1.084-1.295) |
| > 2 hours/day                            | 1.166 (1.059-1.284) | 1.130 (1.038-1.230) |

Note: PA: physical activity; OR: odds ratio; CI: confidence interval; sex, energy intakes, physical activity, region (in urban and rural areas), and survey year, and educational level, and smoking status were adjusted for.
